# Supplementary material
Source: publisher site journal article supplement (https://www.spandidos-publications.com/5703/downloadSupplementary)

Figure S1. (A) Deep learning was performed using 340 colonoscopy images taken after neoadjuvant chemotherapy. The diagnostic model was validated with an independent validation set including 83 endoscopic images. The area under the curve value was (B) 0.993 and (C) 0.592 for the learning and validation sets, respectively.

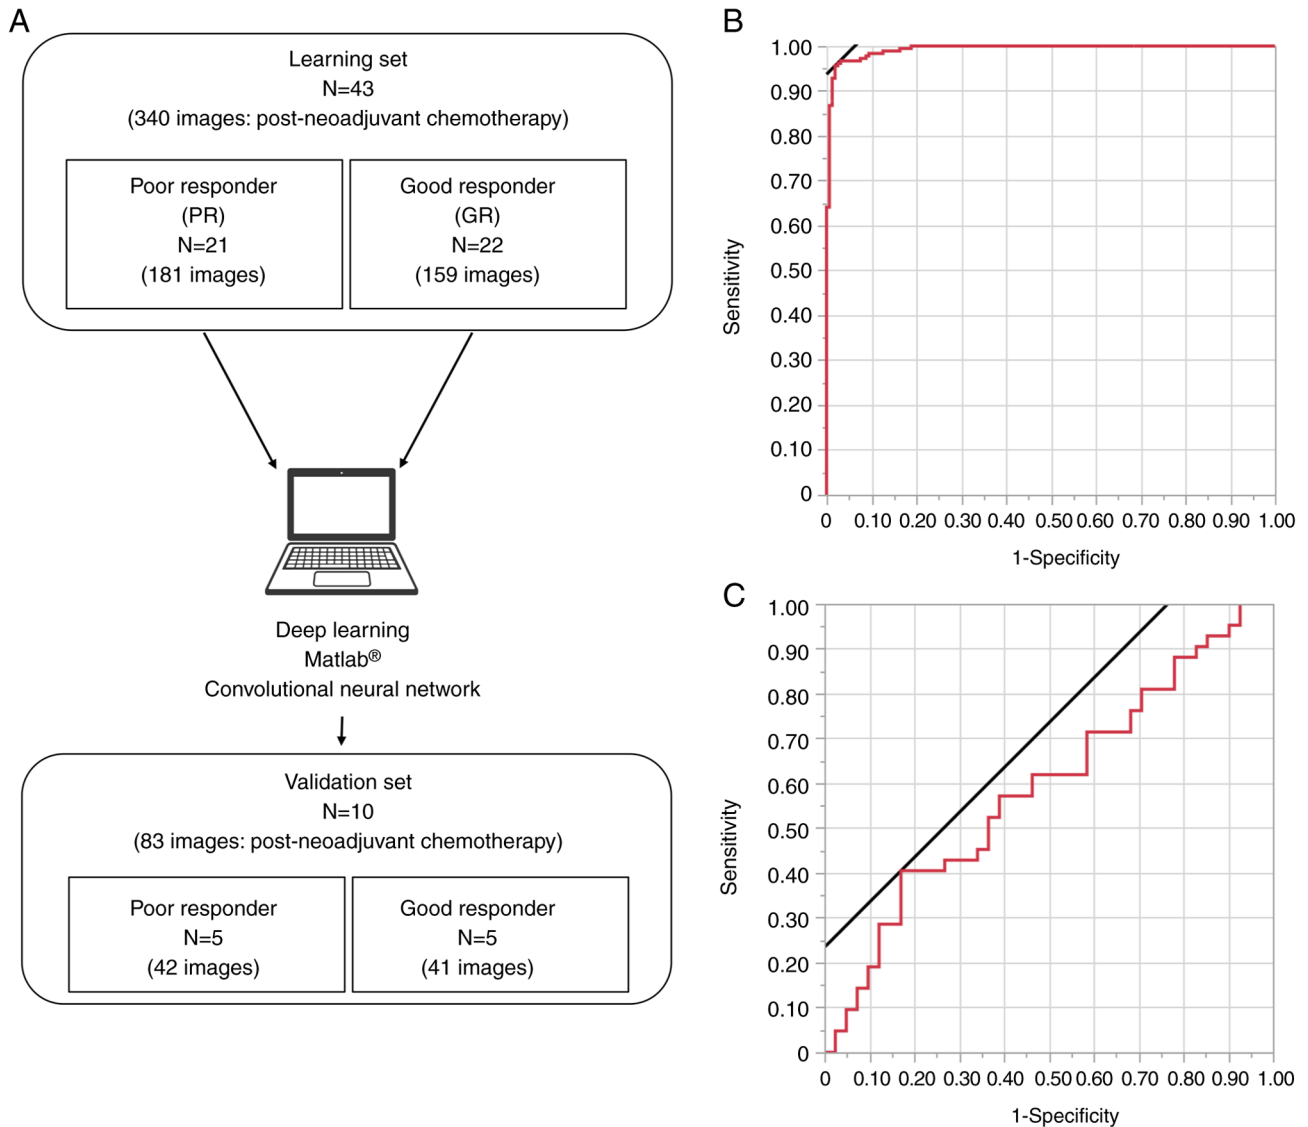

Supplement: Supplementary file 1 [file downloadSupplementary]
